# Supplementary material
Source: ML conference proceedings conference paper supplement (https://openreview.net/forum?id=cI7WAadODh)
Supplement: supplementary_material [file attachment]

# AN INVEX RELAXATION APPROACH FOR MINIMIZING POLARIZATION FROM FULLY AND PARTIALLY OBSERVED INITIAL OPINIONS

**Anonymous authors**

Paper under double-blind review

## ABSTRACT

This paper investigates the problem of minimizing polarization within a network, operating under the foundational assumption that the evolution of underlying opinions adheres to the most prevalent model, the Friedkin-Johnson (FJ) model. We show that this optimization problem under integrality constraints is  $\mathcal{NP}$ -Hard. Furthermore, we establish that the objective function fits into a specialized category of nonconvex functions called invex, where every local minimum is a global minimum. We extend this characterization to encompass a comprehensive class of matrix functions, including those pertinent to polarization and multiperiod polarization, even when addressing scenarios involving stubborn actors. We propose a novel nonconvex framework for this class of matrix functions with theoretical guarantees and demonstrate its practical efficacy for minimizing polarization without getting stuck at local minima. Through empirical assessments conducted in real-world network scenarios, our proposed approach consistently outperforms existing state-of-the-art methodologies. Moreover, we extend our work to encompass a novel problem setting that has not been previously studied, wherein the observer possesses access solely to a subset of initial opinions. Within this agnostic framework, we introduce a nonconvex relaxation methodology, which provides similar theoretical guarantees as outlined earlier and effectively mitigates polarization.

## 1 INTRODUCTION

In recent times, there has been a notable surge in the utilization of social media, accompanied by its increasingly pivotal role in shaping the discourse of global politics. Prominent social networks such as Twitter, Mastodon, Reddit, and others have emerged as influential platforms for users to articulate their viewpoints and participate in socio-political dialogues. Ironically, the original intention of social media to foster connectivity among individuals has, at times, yielded an unintended consequence: the emergence of echo chambers. This phenomenon arises from the preferential attachment behavior exhibited by users who tend to associate with others of similar inclinations, including shared political beliefs, as elucidated by Adamic & Glance (2005). Consequently, this trend has culminated in the polarization of active users within social media platforms along partisan lines, which, in turn, poses a potential threat to democratic ideals. The exposure of individuals primarily to like-minded peers serves to reinforce their preexisting convictions, a phenomenon identified by Cass (2002). This reinforcement of congruent perspectives, in turn, steers users toward confirmation bias, inadvertently increasing the polarization of the network (Kahneman, 2011).

Polarization within the realm of social networking platforms can be attributed to a complex interplay between an individual's actions and the underlying social algorithms governing the provision of customized user experiences, which encompass features like personalized links and community recommendations (Lazer, 2015). Bakshy et al. (2015) delved into the impact of social media, exemplified by Facebook, on user perspectives and illuminated the salient role played by individual choices. These choices include interactions within one's social circles and the deliberate consumption of specific content, both of which wield substantial influence over the extent to which individuals are exposed to divergent ideological viewpoints. Consequently, comprehending the dynamics of polarization necessitates a profound understanding of the intricate processes through which people form their opinions and perspectives, rooted in the dual forces of social influence and social selection.

A vast amount of literature on opinion dynamics tries to model the evolution of opinions mathematically and study how it affects human behavior (Bonabeau, 2002; Centola, 2018). Within the scope of this study, our primary emphasis centers on the examination of opinion dynamics as manifested within network structures. Among the well-recognized category of opinion dynamics models, a prominent subset is constituted by averaging models applied to networks. These models characterize an individual’s opinion as a weighted aggregate of the opinions held by their neighbors in the network, a concept that has been extensively elaborated upon in Friedkin (1986); DeGroot (1974); Proskurnikov & Tempo (2017), and Abelson (1964).

In this paper, we seek to understand how an administrator of a social networking platform can strategically modify the network’s topology while adhering to predefined budget constraints, with the overarching objective of mitigating polarization. For the rest of this paper, we assume that the underlying opinions evolve using one of the popular averaging models, Friedkin and Johnsen’s opinion formulation model, which incorporates the initial opinions of individuals into the averaging process. We aim to address the scenario outlined below.

**Instance:** Consider an undirected network denoted as  $G$ , characterized by  $V$  users (nodes) and  $E$  edges. Each user maintains an immutable initial opinion. The evolution of these opinions is governed by the Friedkin-Johnsen (FJ) opinion dynamics model. Within this framework, a budget denoted as  $k$ , where  $k > 0$ , can be allocated either for distribution among the existing edges of  $G$  or for adding new edges to the network.

**Problem 1.** *How can the network administrator alter the network topology within the budget  $k$  to minimize polarization?*

Figure 1 shows the reduction in polarization using our proposed nonconvex relaxation on the classic Karate Club Network. While expressed or external opinions are empirically quantifiable, a fundamental limitation of the FJ model is the near impossibility of having prior knowledge of the initial opinions of all users. In many real-world scenarios, only a few users share their opinions on a social media platform about a topic, while many may prefer not to share their opinions publicly. In response to this challenge, we expand our research to address an unexplored problem setting, where the observer or administrator has access to only a subset of users’ initial opinions. This is described below.

**Problem 2.** *Let  $s$  represent the vector of initial opinions of users defined by  $s = [s_1^T \ s_2^T]^T$ , where  $s_1$  denotes the vector containing the known initial opinions of users, and  $s_2$  is the vector of the unknown initial opinions. How can the administrator/observer minimize polarization by altering the network topology when oblivious to  $s_2$ ?*

### Our Main Contributions:

- **Global Optimality:** We provide a general matrix result showing that every local minimum is a global minimum for a general class of matrix functions,  $s^T M^{-k} s$ , with  $M \succ 0$ ,  $s \in \mathbb{R}^n$  and an integer  $k > 1$ , where polarization and multiperiod polarization represent specific cases. [Theorem 1, Section 4.1]. We also extend this result to the presence of stubborn actors [Lemma 1].
- **Hardness:** We show that the minimizing polarization under integral constraints is  $\mathcal{NP}$ -Hard [Lemma 5].
- **Invox Relaxation for both known and partially known initial opinions :** We provide an invox (nonconvex) relaxation with guarantees of global minimum for minimizing polarization and multiperiod polarization for known initial opinions. We use projected gradient descent to solve this relaxation, notably surpassing existing state-of-the-art approaches [Section 6]. We also provide an invox (nonconvex) formulation with similar theoretical guarantees to minimize polarization when the administrator has access only to a partial set of users’ initial opinions [Section 5].
- **A Novel Framework:** Our contribution centers on the introduction of a novel continuous optimization framework for minimizing single and multiperiod polarization, as well as polarization under stubborn actors. Instead of prescribing a particular method, we provide a general framework that can be employed with various continuous optimization algorithms.

**Organization:** The paper is structured as follows: Section 2 reviews the Friedkin-Johnsen model and the terminology pertinent to polarization. Section 3 discusses the prior related research. Section 4 is dedicated to a comprehensive theoretical examination of the objective function associated with

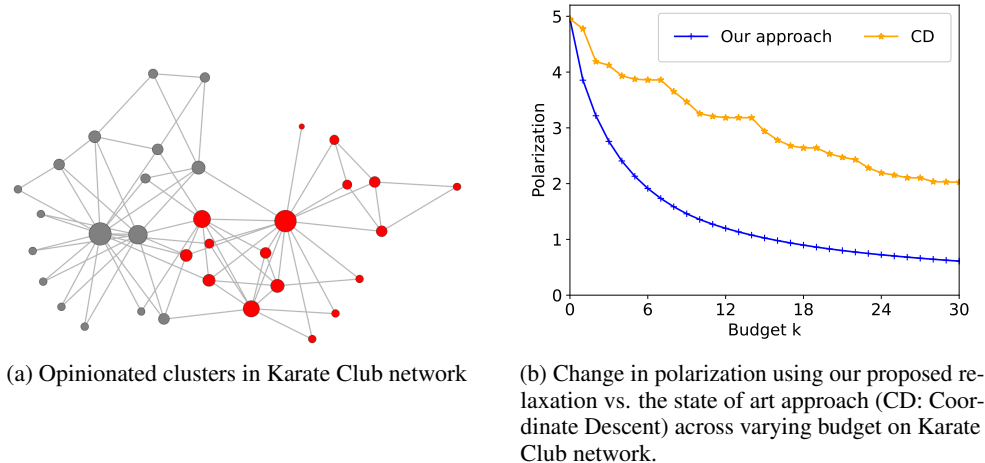

Figure 1: Reduction in Polarization on Karate Club Network

polarization minimization. Section 5 provides nonconvex formulations designed for scenarios where the administrator/observer has partial and complete access to users’ initial opinions. Finally, Section 6 presents empirical findings relevant to the problem under investigation.

**Notation:** The set of natural and real numbers is denoted by  $\mathbb{N}$  and  $\mathbb{R}$ , respectively. For a matrix  $M$ ,  $M_{ij}$  is the entry in the  $i^{\text{th}}$  row and  $j^{\text{th}}$  column. The identity matrix is represented as  $I$ . The vectorized form of a matrix  $M$  is denoted as  $\text{vec}(M)$ . The sets encompassing positive definite (PD) and positive semi-definite (PSD) matrices are respectively designated as  $S_{++}^n$  and  $S_+^n$ . The Laplacian matrix of the adjacency matrix for graph  $G$  is denoted as  $L$  and defined by the equation  $L = D - W$ , where  $D$  is a diagonal matrix of (weighted) degrees associated with each node and  $W$  is the weighted adjacency matrix. It is known that the graph Laplacian is a positive semi-definite matrix, and the set of Laplacian matrices  $\mathcal{L}$  is a convex set. The algebraic connectivity of a given Laplacian matrix is provided by its second smallest eigenvalue,  $\lambda_2$ . We use  $\text{Tr}$  to denote the trace of the matrix. In the context of a vector  $s$ ,  $\|s\|_1$  and  $\|s\|_2$  correspond to the  $\ell_1$  and  $\ell_2$  norms, respectively. Furthermore, the  $\ell_0$  norm signifies the count of non-zero entries within the matrix or vector.

## 2 PRELIMINARIES

### 2.1 FRIEDKIN-JOHNSEN MODEL (FJ)

FJ is a well-regarded opinion dynamics framework that considers the inherent opinions of individuals within a network (Friedkin, 1986). Within this model, we represent the immutable, initial opinions of users/actors as  $s \in \mathbb{R}^n$  and the expressed opinions as  $z \in \mathbb{R}^n$ . Additionally, we use  $w_{ij} \geq 0$  to denote the weight associated with edge  $(i, j) \in E$ . The fixed-point iteration at the time step  $t$  governing the FJ opinion dynamics model is expressed as follows:

$$z_i^{(t)} = \frac{s_i + \sum_{j \in N(i)} w_{ij} z_j^{(t-1)}}{\sum_{j \in N(i)} w_{ij} + 1}. \quad (1)$$

At each discrete time step, each actor within the network adopts an expressed opinion that is proportionally influenced by the average of their own inherent opinion and the opinions held by their network neighbors. It is well-established that the FJ dynamics exhibit convergence towards an equilibrium set of opinions  $z^*$  given by  $z^* = (I + L)^{-1}s$  (Bindel et al., 2015). FJ model has also been studied in the presence of stubborn actors Xu et al. (2022). The fixed-point iteration governing the dynamics of node  $i$  in this context is given as follows:

$$z_i^{(t)} = \frac{k_i s_i + \sum_{j \in N(i)} w_{ij} z_j^{(t-1)}}{\sum_{j \in N(i)} w_{ij} + k_i}. \quad (2)$$

In the equation above, the variable  $k_i$ ,  $k_i \geq 0$ , signifies the degree of stubbornness for a given node. Through the iterative application of equation (2), the expressed opinion vector at equilibrium, denoted as  $z^*$ , is given by  $(L + K)^{-1} K s$ , where  $K$  represents a diagonal matrix with  $k_i$  as its diagonal entries. A detailed discussion of the mathematical models of social influence is provided in the supplementary section.

## 2.2 POLARIZATION UNDER FJ DYNAMICS

In this section, we formally define our problem and provide an array of definitions that are used in the literature. In the following, the notations  $\bar{s}$  and  $\bar{z}$  represent mean-centered initial opinions and expressed opinions, respectively. In the context of a graph  $G$  with associated initial opinions,  $\bar{s}$ , the expressed opinions at equilibrium are determined by the expression  $\bar{z} = (I + L)^{-1} \bar{s}$

**Definition 1** (Polarization). *The polarization or controversy of an undirected network is defined as  $\mathcal{P}(\bar{z}) = \bar{z}^T \bar{z} = \bar{s}^T (I + L)^{-2} \bar{s}$  (Chen et al., 2018; Musco et al., 2018). Polarization formalizes how close the given network is to consensus.*

**Definition 2** (Polarization-Disagreement Index). *Polarization-Disagreement Index is defined as the inner product of initial and expressed opinions and is expressed as  $s^T (I + L)^{-1} s$  (Chen et al., 2018).*

**Definition 3** (Polarization under stubbornness). *Given an undirected network,  $G$  with initial opinions,  $s$ , expressed opinions  $z$ , and the stubbornness matrix  $K$  denoting the degree of stubbornness, the polarization with stubbornness is given by  $\mathcal{P}(z) = s^T K (L + K)^{-1} K (L + K)^{-1} K s$ .*

When  $K = I$ , this definition reduces to non-mean-centered polarization of expressed opinions (Xu et al., 2022).

**Definition 4** (Minimizing Polarization). *When presented with a symmetric adjacency matrix  $A_0$  depicting a graph along with its initial opinions, denoted as  $s \in \mathbb{R}^n$ , and operating under a budget constraint  $k \in \mathbb{N}$ , the primary aim of a network administrator is to determine a graph  $G$  with a symmetric adjacency matrix  $A$  that minimizes polarization. This objective can be articulated as:*

$$\begin{aligned} \arg \min_G \quad & \mathcal{P}(z) \\ \text{subject to} \quad & \|\text{vec}(A) - \text{vec}(A_0)\|_0 \leq 2k \end{aligned} \quad (3)$$

**Definition 5** (Average Conflict Risk (ACR)). *ACR, also referred to as expected conflict risk, is defined by taking expectation over all initial opinions. Assuming that the opinions are sampled from a uniform distribution, it evaluates to  $\text{Tr}((I + L)^{-2})$  (Chen et al., 2018).*

## 3 PRIOR WORK

Numerous researchers across the scientific community have been actively engaged in the study of polarization and its associated characteristics. Previous research on polarization minimization can be broadly classified into two categories: one approach centers on diminishing polarization by introducing perturbations to initial opinions, while the other attains polarization reduction through modifications to the network structure. In this work, our primary focus lies in the domain of reducing polarization by altering the network structure. For a broader review of other related research pertinent to the first category, we refer readers to the supplementary section A. We first discuss the related work pertinent to Problem 1. Musco et al. (2018) delved into the problem of determining an undirected graph topology with a prescribed edge count to minimize polarization and disagreement. Their work established the convexity of the network’s Polarization-Disagreement (PD) index with respect to the Laplacian matrix  $L$ . Moreover, they provided proof of the existence of a graph topology with  $\mathcal{O}(\frac{n}{\epsilon^2})$  edges, approximating the optimum within a factor of  $(1 + \epsilon)$  through the utilization of Spielman and Srivastava’s sparsification algorithm based on effective resistance (Spielman & Srivastava, 2008). Chen et al. (2018) defined polarization as the sum of squares of expressed opinions and proposed a measure called ACR (defined in 5) to minimize polarization in the presence of

an unknown opinion vector. Chitra & Musco (2020) augmented the Friedkin-Johnsen (FJ) model by establishing connections between users who share matching ideologies, aiming to minimize disagreement among users. On similar lines, Gaitonde et al. (2020) showed that the entire graph spectra of the Laplacian matrix are relevant rather than their extreme eigenvalues to maximize repeated disagreement in a network. Bhalla et al. (2023) extended the FJ model and showed how polarization increases via swaps of more agreeable opinionated edges for more disagreeable ones. Recently, Rácz & Rigobon (2023) studied how an administrator or a centralized planner can alter the network to reduce polarization. They show the nonconvexity of the polarization function and bound its value using the Cheeger constant (Chung, 1997). Furthermore, they show that the value of polarization is not monotonic by the addition of edges unless the initial opinions vector is chosen to be the eigenvector corresponding to the second smallest eigenvalue of  $L$ . Rácz & Rigobon (2023) explored the Fiedler difference vector approach (FD) and the coordinate descent approach (CD) as mechanisms for polarization reduction and observed that FD effectively reduces polarization without diminishing network homophily, which is defined as a tendency where similar individuals connect to each other. In the CD approach, non-edges that yield the most significant polarization reduction are iteratively added to the graph until the budget constraint is satisfied. We employ CD, FD, and ACR (defined in 5) approaches as baselines for comparative evaluation against our proposed nonconvex relaxations in Section 6. Since Problem 2 has never been dealt with before, no prior work is dedicated to it. However, related research exists in the limiting case where none of the initial opinions are observed, effectively reducing it to the problem of ACR (5) Chen et al. (2018).

## 4 THEORETICAL RESULTS

In this section, we study the global optimality of polarization. To that end, we show that it falls under a special kind of nonconvex function, namely the invex function. Invex functions can be seen as a generalization of convex functions. Hanson (1981) defined invexity as follows.

**Definition 6.** Let  $f(\theta)$  be a function defined on a set  $\mathcal{C}$ . Let  $\eta$  be a vector-valued function defined in  $\mathcal{C} \times \mathcal{C}$  such that the Frobenius inner product,  $\langle \eta(\theta_1, \theta_2), \nabla f(\theta_2) \rangle$ , is well defined  $\forall \theta_1, \theta_2 \in \mathcal{C}$ . Then  $f(\theta)$  is a  $\eta$ -invex function if  $f(\theta_1) - f(\theta_2) \geq \langle \eta(\theta_1, \theta_2), \nabla f(\theta_2) \rangle$ ,  $\forall \theta_1, \theta_2 \in \mathcal{C}$ .

A function is an invex function iff it attains global minima at every stationary point Ben-Israel & Mond (1986). Next, we prove the invexity of a general class of functions. While this result can be of independent interest, we restrict our attention to minimizing polarization and related problems. Unless explicitly stated, all the formulations mentioned below work for both mean and non-mean-centered vectors. By little abuse of notation, we represent  $\eta$  as a vector or matrix, depending on the specific context, in order to enhance the clarity of our presentation when the implications of such a representation are readily discernible.

**Note:** All the proofs are in the supplementary material.

**Theorem 1.** The class of matrix functions  $f(M) = s^T M^{-k} s$ , with  $M \succ 0$  and any integer  $k > 1$  are  $\eta$ -invex for  $\eta(\cdot, M) = M$ .

**Corollary 1.** As a consequence of Theorem 1, the polarization function,  $f(L) = s^T (I + L)^{-2} s$ , is  $\eta$ -invex for  $\eta(\cdot, L) = I + L$ .

The nonconvexity of the function  $s^T M^{-2} s$  for  $M \succ 0$  can be shown by restricting it to a line.

For example, plot of  $f(z) = s^T \begin{bmatrix} z & 0.9 \\ 0.9 & 1 \end{bmatrix}^{-2} s$  with respect to  $z \in [1, 2]$  and  $s = \begin{bmatrix} 1 \\ 1 \end{bmatrix}$  is visibly

nonconvex (the figure is provided in the supplementary material section C). Thus,  $s^T M^{-2} s$  is a nonconvex but invex function. In the following lemma, we show that the polarization remains invex even in the presence of stubborn actors.

**Lemma 1.** Let  $K$  represent the diagonal matrix of stubbornness coefficients associated with stubborn actors in the network. The polarization function  $f(L) = s^T K(L + K)^{-1} K(L + K)^{-1} K s$  is  $\eta$ -invex for  $\eta(\cdot, L) = \frac{(L+K)}{2}$ .

**Lemma 2.** For  $L \in \mathcal{L}$ , the Average Conflict Risk,  $f(L) = \text{Tr}(I + L)^{-2}$ , is convex.

The above result follows due to the fact that for any positive definite matrix  $A$ ,  $\text{Tr}(A^{-r})$  for  $r > 0$  is convex due to the positivity of trace of products of positive definite matrices (proposition 10.6.17 from Bernstein (2009)).

#### 4.1 MULTIPERIOD POLARIZATION

So far, we have considered a single time period polarization. As an extension, it is natural to consider a similar objective over a prolonged time instance. We consider a  $\mathcal{T}$ -period polarization as an extension to one-period polarization defined in (1). In the first time period, the expressed opinions  $z(\mathcal{T}(1))$  are  $(I + L)^{-1}s$ . These become the initial opinions for the next subsequent step, and the expressed opinions at the second period become  $z(\mathcal{T}(2)) = (I + L)^{-2}s$ . The polarization of these opinions is then added to the initial polarization. This process is repeated for  $\mathcal{T} + 1$  time steps, where  $\mathcal{T} \in \mathbb{N} \cup \{\infty\}$ . In a multi-period setup, the objective is to minimize polarization across all time periods. By incorporating this, we get the following framework:

$$\min_{L \in \mathcal{L}} s^T [(I + L)^{-2} + (I + L)^{-4} + (I + L)^{-6} + \dots + (I + L)^{-2\mathcal{T}-2}] s. \quad (4)$$

**Lemma 3.** *The multiperiod polarization, i.e., the objective function given in equation equation 4, is  $\eta$ -invex for  $\eta(\cdot, L) = I + L$ .*

The following Lemma quantitatively characterizes the global minimum and helps us understand the graph structures where the global minimum is attained for multiperiod polarization.

**Lemma 4.** *The global minimum for multiperiod polarization is attained for complete graphs.*

The theoretical results provided in Theorem 1, Corollary 1, Lemmas (1, 2 and 3) imply that every local minimum is a global minimum for optimization problems such as ACR 5 and  $s^T M^{-k}s$ ,  $M \succ 0$ . There exists polynomial time algorithms to solve ACR. However, the polarization function given in equations 3 is not known to be convex (Rác & Rigobon, 2023). Moreover, Lemma 5 shows that minimizing polarization under integrality constraints is  $\mathcal{NP}$ -Hard. This rules out the possibility of having a polynomial time algorithm unless  $\mathcal{P} = \mathcal{NP}$ .

**Lemma 5.** *Let  $G$  be an undirected graph with its associated graph Laplacian  $L$ . Let the budget  $k$  denote the number of graph edits in terms of edges. For a specific choice of initial opinions vector, identifying a graph Laplacian,  $L$ , nearest to the given graph Laplacian,  $L_0$  within a budget  $k$  and having minimum adversarial polarization is  $\mathcal{NP}$ -hard.*

## 5 NONCONVEX RELAXATION FOR MINIMIZING POLARIZATION

While Theorem 1 and Lemma 3 establish that polarization and multiperiod polarization are invex functions, they do not readily provide a framework to solve them. Next, we develop a nonconvex relaxation framework for Problem 1 and 2 to minimize polarization. We first delve into a scenario where the observer is limited to accessing only a subset of the users' initial opinions within the network (Problem 2). The vector of initial opinions of users, denoted as  $s = [s_1^T \quad s_2^T]^T$ , is partitioned into two components:  $s_1$ , comprising the known initial opinions of users, and  $s_2$ , representing the initial opinions that remain concealed from the observer. We assume that  $s_2$  follows a distribution characterized by a zero mean and an identity covariance matrix, such as the standard Gaussian or uniform distributions. Formally, we take  $\mathbb{E}(s_2) = 0$  and  $\mathbb{E}(s_2 s_2^T) = I$ . Let us represent  $(I + L)^{-2}$  as  $\begin{bmatrix} W_{11} & W_{12} \\ W_{12} & W_{22} \end{bmatrix}$ , with each  $W_{ij}$  being a block matrix having appropriate dimensions. For the sake of clarity, we omit the dimension details when they are evident from the context. Using the definition of polarization, we obtain:

$$\begin{aligned} f(L) &= s^T (I + L)^{-2} s = [s_1^T \quad s_2^T] \begin{bmatrix} W_{11} & W_{12} \\ W_{12} & W_{22} \end{bmatrix} \begin{bmatrix} s_1 \\ s_2 \end{bmatrix} \\ &= s_1^T W_{11} s_1 + s_1^T W_{12} s_2 + s_2^T W_{12} s_1 + s_2^T W_{22} s_2 \end{aligned}$$

It is important to highlight that  $f(L)$  is a random variable owing to the presence of  $s_2$ . Therefore, our objective is to minimize the expected polarization. Taking the expectation on both sides leads to:

$$\mathbb{E}(f(L)) = \mathbb{E}(s_1^T W_{11} s_1) + \mathbb{E}(\text{Tr}(W_{22} s_2 s_2^T)) = s_1^T W_{11} s_1 + \text{Tr}(W_{22})$$

While a two-step approach involving the initial minimization of  $s_1^T W_{11} s_1$  followed by the minimization of  $\text{Tr}(W_{22})$  might seem appealing, the budget constraint prohibits their decoupling. Our subsequent result establishes that the expected polarization  $\mathbb{E}(f(L))$  is an invex function.

**Theorem 2.** *Given a vector  $s \in \mathbb{R}^n$  defined as  $s = [s_1^T \quad s_2^T]^T$ , where  $s_1 \in \mathbb{R}^{n-m}$  and  $s_2 \in \mathbb{R}^m$ , and assuming that  $s_2$  is selected from a distribution satisfying  $\mathbb{E}(s_2) = 0$  and  $\mathbb{E}(s_2 s_2^T) = I$ , it follows that  $\mathbb{E}(f(L))$  is invex.*

This result stems from the observation that the expected polarization can be expressed as a summation of invex functions. To illustrate this, we rephrase the expected polarization as  $\mathbb{E}(f(L)) = a^T (I + L)^{-2} a + \sum_{i=1}^m b_i^T (I + L)^{-2} b_i$ , where  $a = [s_1^T \quad 0]^T$  and  $b_i = [0 \quad e_i^T]^T$  for all  $i = \{1, \dots, m\}$ , with  $e_i \in \mathbb{R}^m$  denoting the standard unit vector containing a 1 at its  $i$ -th entry. We propose the following nonconvex relaxation for this scenario:

$$\begin{aligned} \min_L \quad & a^T (I + L)^{-2} a + \sum_{i=1}^m b_i^T (I + L)^{-2} b_i \\ \text{subject to} \quad & L \in \mathcal{L} \\ & \|\text{vec}(L) - \text{vec}(L_0)\|_1 \leq 4k. \end{aligned} \tag{5}$$

It is worth noting that the proposed nonconvex (Invex) formulation framework provides a generalization of the established Average Conflict Risk (ACR) measure (5) for the purpose of polarization minimization. Observe that we relax the nonconvex budget constraint  $\ell_0$  to  $\ell_1$  and express it in terms of Laplacian rather than adjacency matrix (unlike stated in equation (3)). The budget constraint has been modified to  $4k$  instead of  $2k$  because it affects *four* entries of the Laplacian matrix ( $\{(i, j), (j, i), (i, i), (j, j)\}$ ).

When all initial opinions are known (Problem 1), i.e.,  $s = s_1$ , equation 5 simplifies to:

$$\begin{aligned} \min_L \quad & s^T (I + L)^{-2} s \\ \text{subject to} \quad & L \in \mathcal{L} \\ & \|\text{vec}(L) - \text{vec}(L_0)\|_1 \leq 4k. \end{aligned} \tag{6}$$

This is a result of  $\sum_{i=1}^m b_i^T (I + L)^{-2} b_i = 0$  since  $b_i = 0$  (as  $s_2$  is a null vector). In this paper, we aim to solve the equation 5 and equation 6. A practical limitation when solving such nonconvex formulations is that the resulting Laplacian can become dense. Even for smaller budgets, we observed that the solution tends to converge to a complete graph with smaller weights distributed across the network. To address this, we further prune the solution obtained by using a thresholding parameter  $\rho$  to discard smaller weights in  $L$  and set them to zero. Notice that after pruning the resultant matrix,  $\hat{L}$  need not be a Laplacian. We get the optimal Laplacian  $L^{proj}$  closest to  $\hat{L}$  by projecting the diagonal entries:  $L_{ii}^{proj} = -\sum_{j=1, j \neq i}^n \hat{L}_{ij}, \forall i \in \{1, \dots, n\}$  (Sato, 2019). Only the diagonal entries need to be updated after pruning. The nonconvex relaxations mentioned above can be readily extended to address multiperiod polarization and polarization scenarios involving stubborn actors due to the invex nature of the objective functions (Lemma 1 and 3). It is worth noting that any first-order algorithm should be applicable to our framework provided in equations (5, 6) to attain global optimality. We use the projected gradient descent (PGD) algorithm to solve the equations 5, 6. In the next section, we empirically demonstrate that our relaxations lead to better minima with a few iterations of PGD.

## 6 EXPERIMENTAL RESULTS

### 6.1 FOR KNOWN INITIAL OPINIONS (PROBLEM 1)

Apart from the Coordinate Descent approach (CD) proposed by Rácz & Rigobon (2023), two other approaches to minimize polarization are to minimize  $\text{Tr}((I + L)^{-2})$  (ACR defined at 5) and maximize  $\lambda_2(L)$  (from Lemma 5) (Ghosh & Boyd, 2006; Wang & Van Mieghem, 2010). The heuristic approach to maximize  $\lambda_2(L)$  is based on adding edges between nonadjacent vertices in the graph that have the

largest absolute difference in the entries of Fiedler vector (Chung, 1997). In this section, we compare the empirical performance of our nonconvex (invex) relaxation (equation 6) with the Coordinate Descent approach (CD) proposed by Rácz & Rigobon (2023), ACR (Tr minimization) and Fiedler Difference vector (FD) (Wang & Van Mieghem, 2010). We use the projected gradient descent method (PGD) in CVX (Diamond & Boyd, 2016; Agrawal et al., 2018) to solve our proposed nonconvex relaxation. We study the performance of our approach on real-world and synthetic networks. For synthetic networks, we consider the stochastic block models. Further experimental results on networks such as Zachary’s Karate Club, Sawmill Network, The US Senate Network, Polbooks, Preferential Attachment (scale-free) graphs, and Erdős-Rényi are provided in the supplementary material.

**Stochastic Block Model:** The Stochastic Block Model (SBM) generates random graphs with inherent community structure, emphasizing node groups. In our simulation, we create two communities, each with 250 nodes. Inter-cluster and intra-cluster densities are 0.02 and 0.08, resulting in 500 nodes and 6,359 edges in the network. We distribute initial opinions in two ways: (1) assigning "-1" to one block and "+1" to the other, creating well-connected opinionated clusters (see Figure 2(a)), and (2) uniformly distributing "+1" and "-1" opinions within each block (Figure 2(b)). Across both scenarios, the invex relaxation method consistently outperforms the Coordinate Descent, Tr, and FD methods. We use the thresholding parameter  $|\rho| = 0.0002$ , step size  $\alpha = 0.5$ , and run PGD for 100 iterations. In the first scenario, with distinctly separated opinionated clusters, the average number of edges using our proposed nonconvex (invex) relaxation with thresholding parameter  $\rho$  is 7,942. In the second scenario, with uniform opinion distribution, it is 7,616 (after thresholding).

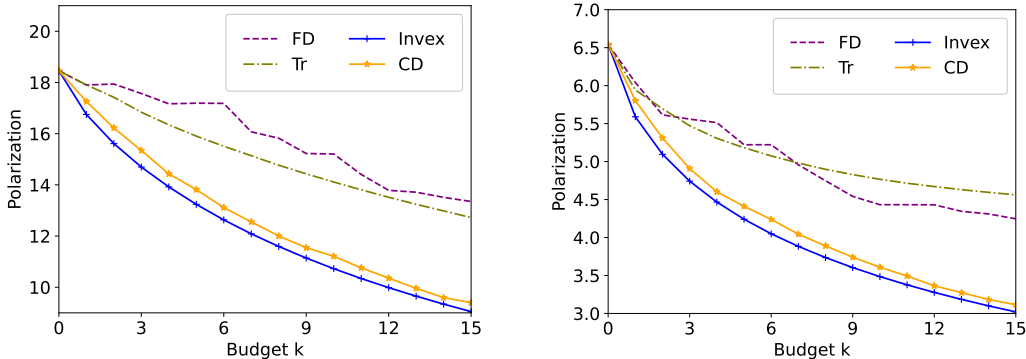

(a) Change in polarization with budget  $k$  in SBM when an initial opinion of "-1" is assigned to one community of nodes and an opinion "+1" to the other community.

(b) Change in polarization for uniformly distributed opinions within each community in SBM.

Figure 2: Reduction in Polarization on Stochastic Block Model

Our empirical analysis shows that our proposed nonconvex relaxation consistently outperforms other methods in reducing polarization. The Fiedler Difference (FD) approach primarily aims to reduce polarization by increasing algebraic connectivity, as demonstrated in Lemma 5. While raising the second smallest eigenvalue ( $\lambda_2$ ) may cause other eigenvalues to increase as  $L \in S_+^n$ , this increase is insufficient for FD to achieve significant polarization reduction. In the second scenario of our construction of SBM, the FD approach seeks to maximize  $\lambda_2$  by introducing additional edges within the opinionated clusters, potentially inadvertently fostering the creation of echo chambers.

**Twitter:** The Twitter dataset, originally gathered for the analysis of the Delhi legislative assembly elections debate by De et al. (2014) through hashtags such as #BJP, #AAP, #Congress, and #Polls2013, comprises an undirected network involving 548 users with a total of 3638 interactions. Initial opinions are derived from user interactions on Twitter employing sentiment analysis. Figure 3(a) illustrates the polarization variation across different budgets ( $k = 1, 15, 20, 25, 30$ ) using our nonconvex relaxation (equation 6), CD, Trace minimization, and FD methodologies. The projected gradient descent method for equation 6 is executed for a maximum of 130 iterations across all budgets, with a step size of  $\alpha = 0.5$  and a thresholding parameter  $|\rho| = 0.0002$ . Notably, the reduction in polarization is most pronounced when employing nonconvex relaxation (equation 6) compared to all other approaches.



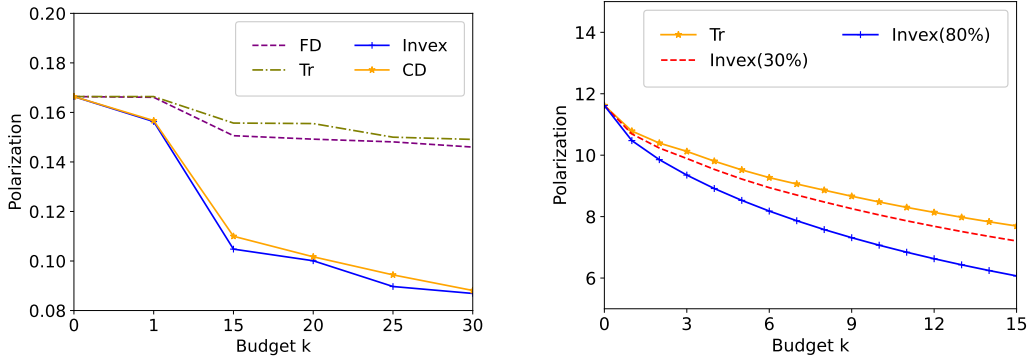

(a) Change in polarization using our proposed non-convex relaxation, CD, Trace and FD on the Twitter network.

(b) Change in polarization with budget for partially observable opinions of (30% and 80% of known initial opinions) using invex relaxation and  $\text{Tr}((I + L)^{-2})$

Figure 3: Reduction in Polarization on the Twitter network (Problem 1) and on SBM with partially observable initial opinions (Problem 2)

## 6.2 FOR PARTIALLY OBSERVABLE INITIAL OPINIONS (PROBLEM 2)

In this section, we study the empirical performance of our proposed invex relaxation method, as presented in equation 5, and the Average Conflict Risk (ACR) measure defined in 5. It’s worth noting that equation 5 serves as a generalization of the ACR measure.

**Stochastic Block Model:** We generate an SBM model using the parameters as described in 6.1, where the unknown initial opinions of users are drawn from a uniform distribution over all vectors in  $\{-1, +1\}^n$ . Figure 3(b) illustrates the polarization variation with the budget, considering scenarios where the observer possesses access to 30% and 80% of users’ initial opinions. We experimented on two partial observable percentages of initial opinion. It is evident that our proposed nonconvex (invex) relaxation consistently outperforms the Average Conflict Risk (ACR) measure and is equal to its value  $\text{Tr}(I + L)^{-2}$  only when the observer has no knowledge of any users’ opinions.

**Interpretation in social context:** Based on empirical observations, our optimization approaches presented in equations equation 5 and equation 6 effectively minimize polarization by introducing additional edges among users with polarized opinions. This aligns with findings from previous research, including Chitra & Musco (2020); Kahneman (2011); Rác & Rigobon (2023). Utilizing continuous relaxation techniques as demonstrated in equation 5 and equation 6, we can identify significant interactions within a social network, typically represented by edges with high weights that play a pivotal role in the minimization of polarization. Armed with this insight, a network administrator can offer link recommendations and promote exposure to diverse content among network users. This strategic approach helps prevent the reinforcement of like-minded opinions, ultimately contributing to the reduction of polarization within the network.

**Conclusion and Future Directions:** This paper addresses polarization mitigation by altering network topology in two scenarios: when initial opinions are known and when the observer has partial knowledge of the opinions. We introduce a novel nonconvex relaxation framework for known opinions and demonstrate the projected gradient descent’s efficacy in polarization minimization. We extend this to scenarios with incomplete knowledge of initial opinions, proposing a novel nonconvex formulation that generalizes the ACR (trace minimization) approach. Continuous relaxation techniques, as shown in equation 5 and equation 6, identify pivotal interactions that can be leveraged to provide link recommendations and diversify content exposure to mitigate polarization.

Existing scalability studies primarily focus on the computation of the polarization, denoted as  $s^T(I + L)^{-2}s$  (Xu et al., 2021). In the future, it might be of significant interest to explore the applicability of analogous concepts, in conjunction with our findings, to minimize polarization for larger network configurations.

## REFERENCES

- Robert P Abelson. Mathematical models of the distribution of attitudes under controversy. *Contributions to mathematical psychology*, 1964.
- Lada A Adamic and Natalie Glance. The political blogosphere and the 2004 us election: divided they blog. In *Proceedings of the 3rd international workshop on Link discovery*, pp. 36–43, 2005.
- Akshay Agrawal, Robin Verschueren, Steven Diamond, and Stephen Boyd. A rewriting system for convex optimization problems. *Journal of Control and Decision*, 5(1):42–60, 2018.
- Eytan Bakshy, Solomon Messing, and Lada A Adamic. Exposure to ideologically diverse news and opinion on facebook. *Science*, 348(6239):1130–1132, 2015.
- Adi Ben-Israel and Bertram Mond. What is invexity? *The ANZIAM Journal*, 28(1):1–9, 1986.
- Dennis S Bernstein. Matrix mathematics. In *Matrix Mathematics*. Princeton university press, 2009.
- Nikita Bhalla, Adam Lechowicz, and Cameron Musco. Local edge dynamics and opinion polarization. *arXiv preprint arXiv:2111.14020*, 2021.
- Nikita Bhalla, Adam Lechowicz, and Cameron Musco. Local edge dynamics and opinion polarization. In *Proceedings of the Sixteenth ACM International Conference on Web Search and Data Mining*, pp. 6–14, 2023.
- David Bindel, Jon Kleinberg, and Sigal Oren. How bad is forming your own opinion? *Games and Economic Behavior*, 92:248–265, 2015.
- Eric Bonabeau. Agent-based modeling: Methods and techniques for simulating human systems. *Proceedings of the national academy of sciences*, 99(suppl\_3):7280–7287, 2002.
- Sunstein Cass. The law of group polarization. *Journal of Political Philosophy*, 10(2):175–195, 2002.
- Damon Centola. *How behavior spreads: The science of complex contagions*, volume 3. Princeton University Press Princeton, NJ, 2018.
- Mayee F Chen and Miklós Z Rácz. An adversarial model of network disruption: Maximizing disagreement and polarization in social networks. *IEEE Transactions on Network Science and Engineering*, 9(2):728–739, 2021.
- Xi Chen, Jefrey Lijffijt, and Tijn De Bie. Quantifying and minimizing risk of conflict in social networks. In *Proceedings of the 24th ACM SIGKDD International Conference on Knowledge Discovery & Data Mining*, pp. 1197–1205, 2018.
- Uthsav Chitra and Christopher Musco. Analyzing the impact of filter bubbles on social network polarization. In *Proceedings of the 13th International Conference on Web Search and Data Mining*, pp. 115–123, 2020.
- Fan RK Chung. *Spectral graph theory*, volume 92. American Mathematical Soc., 1997.
- Abir De, Sourangshu Bhattacharya, Parantapa Bhattacharya, Niloy Ganguly, and Soumen Chakrabarti. Learning a linear influence model from transient opinion dynamics. In *Proceedings of the 23rd ACM International Conference on Conference on Information and Knowledge Management*, pp. 401–410, 2014.
- Morris H DeGroot. Reaching a consensus. *Journal of the American Statistical association*, 69(345): 118–121, 1974.
- Steven Diamond and Stephen Boyd. CVXPY: A Python-embedded modeling language for convex optimization. *Journal of Machine Learning Research*, 17(83):1–5, 2016.
- Paul Erdos and Alfred Renyi. On the evolution of random graphs. *Publ. Math. Inst. Hungary. Acad. Sci.*, 5:17–61, 1960.

- Michalis Faloutsos, Petros Faloutsos, and Christos Faloutsos. On power-law relationships of the internet topology. *ACM SIGCOMM computer communication review*, 29(4):251–262, 1999.
- John RP French Jr. A formal theory of social power. *Psychological review*, 63(3):181, 1956.
- Noah E Friedkin. A formal theory of social power. *Journal of Mathematical Sociology*, 12(2): 103–126, 1986.
- Jason Gaitonde, Jon Kleinberg, and Eva Tardos. Adversarial perturbations of opinion dynamics in networks. In *Proceedings of the 21st ACM Conference on Economics and Computation*, pp. 471–472, 2020.
- Arpita Ghosh and Stephen Boyd. Growing well-connected graphs. In *Proceedings of the 45th IEEE Conference on Decision and Control*, pp. 6605–6611. IEEE, 2006.
- Gene H Golub and Charles F Van Loan. *Matrix computations*. JHU press, 2013.
- Michael Grant and Stephen Boyd. Graph implementations for nonsmooth convex programs. In V. Blondel, S. Boyd, and H. Kimura (eds.), *Recent Advances in Learning and Control*, Lecture Notes in Control and Information Sciences, pp. 95–110. Springer-Verlag Limited, 2008.
- Michael Grant and Stephen Boyd. CVX: Matlab software for disciplined convex programming, version 2.1. <http://cvxr.com/cvx>, March 2014.
- Pedro Guerra, Wagner Meira Jr, Claire Cardie, and Robert Kleinberg. A measure of polarization on social media networks based on community boundaries. In *Proceedings of the international AAAI conference on web and social media*, volume 7, pp. 215–224, 2013.
- Morgan A Hanson. On sufficiency of the kuhn-tucker conditions. *J. Math. Anal. Appl*, 80(2):545–550, 1981.
- Marilena Hohmann, Karel Devriendt, and Michele Coscia. Quantifying ideological polarization on a network using generalized euclidean distance. *Science Advances*, 9(9):eabq2044, 2023.
- Daniel Kahneman. *Thinking, fast and slow*. macmillan, 2011.
- David Lazer. The rise of the social algorithm. *Science*, 348(6239):1090–1091, 2015.
- Antonis Matakos, Evimaria Terzi, and Panayiotis Tsaparas. Measuring and moderating opinion polarization in social networks. *Data Mining and Knowledge Discovery*, 31:1480–1505, 2017.
- Judd H Michael. Labor dispute reconciliation in a forest products manufacturing facility. *Forest products journal*, 47(11/12):41, 1997.
- Damon Mosk-Aoyama. Maximum algebraic connectivity augmentation is np-hard. *Operations Research Letters*, 36(6):677–679, 2008.
- Cameron Musco, Christopher Musco, and Charalampos E Tsourakakis. Minimizing polarization and disagreement in social networks. In *Proceedings of the 2018 world wide web conference*, pp. 369–378, 2018.
- Zachary P. Neal. A sign of the times? weak and strong polarization in the u.s. congress, 1973–2016. *Social Networks*, 60:103–112, 2020. ISSN 0378-8733. doi: <https://doi.org/10.1016/j.socnet.2018.07.007>. Social Network Research on Negative Ties and Signed Graphs.
- Zachary P. Neal. Constructing legislative networks in r using incidentally and backbone. *Connections*, 42(1):1–9, 2022. doi: [doi:10.2478/connections-2019.026](https://doi.org/10.2478/connections-2019.026).
- Kaare Brandt Petersen, Michael Syskind Pedersen, et al. The matrix cookbook. *Technical University of Denmark*, 7(15):510, 2008.
- Anton V Proskurnikov and Roberto Tempo. A tutorial on modeling and analysis of dynamic social networks. part i. *Annual Reviews in Control*, 43:65–79, 2017.

- Ryan Rossi and Nesreen Ahmed. The network data repository with interactive graph analytics and visualization. In *Proceedings of the AAAI conference on artificial intelligence*, volume 29, 2015.
- Miklos Z. Racz and Daniel E. Rigobon. Towards consensus: Reducing polarization by perturbing social networks. *IEEE Transactions on Network Science and Engineering*, pp. 1–16, 2023. doi: 10.1109/TNSE.2023.3262970.
- Kazuhiro Sato. Optimal graph laplacian. *Automatica*, 103:374–378, 2019.
- Daniel A Spielman and Nikhil Srivastava. Graph sparsification by effective resistances. In *Proceedings of the fortieth annual ACM symposium on Theory of computing*, pp. 563–568, 2008.
- Huijuan Wang and Piet Van Mieghem. Algebraic connectivity optimization via link addition. In *3d International ICST Conference on Bio-Inspired Models of Network, Information, and Computing Systems*, 2010.
- Wanyue Xu, Qi Bao, and Zhongzhi Zhang. Fast evaluation for relevant quantities of opinion dynamics. In *Proceedings of the Web Conference 2021, WWW ’21*, pp. 2037–2045, New York, NY, USA, 2021. Association for Computing Machinery. ISBN 9781450383127.
- Wanyue Xu, Liwang Zhu, Jiale Guan, Zuobai Zhang, and Zhongzhi Zhang. Effects of stubbornness on opinion dynamics. In *Proceedings of the 31st ACM International Conference on Information & Knowledge Management*, pp. 2321–2330, 2022.
- Wayne W Zachary. An information flow model for conflict and fission in small groups. *Journal of anthropological research*, 33(4):452–473, 1977.
- Liwang Zhu, Qi Bao, and Zhongzhi Zhang. Minimizing polarization and disagreement in social networks via link recommendation. *Advances in Neural Information Processing Systems*, 34: 2072–2084, 2021.

---

## Supplementary Material: An Invex Relaxation Approach for Minimizing Polarization from Fully and Partially Observed Initial Opinions

---

### A FURTHER RELATED WORK

In this section, we present additional references that pertain to research on polarization using FJ dynamics. Guerra et al. (2013) identified a characteristic of polarized networks, namely, a lower concentration of high-degree nodes in the vicinity of boundaries separating distinct communities. Zhu et al. (2021) provided a scalable greedy algorithm for optimizing the polarization-disagreement index for a given graph by adding a set of edges. They show that the index is monotonic with respect to the addition of edges, and despite the function being non-submodular, they provided a bounded approximation ratio. Chen & Racz (2021) explored the amplification of disagreement and polarization through perturbations in the initial opinions held by network nodes. Bhalla et al. (2021) scrutinized the dependence of polarization on localized edge dynamics, revealing that the introduction of an edge between closely affiliated like-minded users leads to an increase in polarization. Matakos et al. (2017) provided greedy heuristics to minimize polarization by perturbing initial opinions.

### B PROOFS OF THEOREMS AND LEMMAS

#### B.1 PROOF OF THEOREM 1

*Proof.* We first compute the gradient of the function. Let  $X = M^k$ . Then  $f(M) = s^T(X)^{-1}s$ . It is known that:

$$\frac{\partial X^{-1}}{\partial m_{ij}} = -X^{-1} \frac{\partial X}{\partial m_{ij}} X^{-1}. \quad (7)$$

By product rule,

$$\frac{\partial M^k}{\partial m_{ij}} = J^{ij} M^{k-1} + M J^{ij} M^{k-2} + \dots + M^{k-1} J^{ij}, \quad (8)$$

where  $J^{ij}$  is the matrix with 1 at  $(i, j)^{th}$  entry and zero else where. By substituting eq equation 8 in equation 7, we get:

$$\frac{\partial s^T X^{-1} s}{\partial m_{ij}} = -s^T M^{-k} J^{ij} M^{-1} s - s^T M^{-(k-1)} J^{ij} M^{-2} s - \dots - s^T M^{-1} J^{ij} M^{-k} s.$$

Considering  $M^{-l}$  as  $A$  and  $M^{-q}$  as  $B$  and using identity that  $s^T A J^{ij} B s = (A^T s s^T B^T)_{ij}$  (eq (454) from Petersen et al. (2008)) we get

$$\frac{\partial s^T X^{-1} s}{\partial m_{ij}} = -(M^{-k} s s^T M^{-1})_{ij} - (M^{-(k-1)} s s^T M^{-2})_{ij} - \dots - (M^{-1} s s^T M^{-k})_{ij}.$$

This implies:

$$\frac{\partial s^T M^{-k} s}{\partial M} = -M^{-k} s s^T M^{-1} - M^{-(k-1)} s s^T M^{-2} - \dots - M^{-1} s s^T M^{-k}. \quad (9)$$

Equation equation 9 represents the gradient of the function  $s^T M^{-k} s$  with respect to  $M$ . Let  $M, N \in S_{++}^n$ . To show invexity for function a  $f$ , we need to show that there exists an  $\eta(N, M)$  such that

$$f(N) - f(M) \geq \langle \eta(N, M), \nabla f(M) \rangle.$$

In our case, this implies that we need to show the existence of  $\eta(N, M)$  such that

$$s^T N^{-k} s - s^T M^{-k} s \geq \left\langle \eta(N, M), \frac{\partial s^T M^{-k} s}{\partial M} \right\rangle.$$

After substituting for the gradient, we get

$$s^T N^{-k} s - s^T M^{-k} s \geq -\langle \eta(N, M), M^{-k} s s^T M^{-1} \rangle - \dots - \langle \eta(N, M), M^{-1} s s^T M^{-k} \rangle .$$

With little algebraic manipulation, we can write

$$s^T N^{-k} s - s^T M^{-k} s \geq -\text{Tr}(\eta(N, M)^T M^{-k} s s^T M^{-1}) - \dots - \text{Tr}(\eta(N, M)^T M^{-1} s s^T M^{-k}) .$$

The right-hand side of the above expression can be expressed as

$$-\sum_{i=0}^{k-1} \text{Tr}(s^T M^{-(i+1)} \eta(N, M)^T M^{-(k-i)} s) .$$

By choosing  $\eta(N, M) = M$ , we get

$$s^T N^{-k} s - s^T M^{-k} s \geq -\sum_{i=0}^{k-1} \text{Tr}(s^T M^{-k} s) ,$$

which implies

$$s^T N^{-k} s + \sum_{i=0}^{k-2} s^T M^{-k} s \geq 0 .$$

The above result follows because of the positive definiteness of  $N$  and  $M$ . To complete the proof, we also need to show that if  $\nabla f(M) = 0$ , then  $f(N) \geq f(M)$ ,  $\forall N$ , i.e., the stationary point is indeed the global minimum of the function. By equating the gradient to zero, we get

$$-M^{-k} s s^T M^{-1} = M^{-(k-1)} s s^T M^{-2} + \dots + M^{-1} s s^T M^{-k} .$$

Right multiplication with  $M$  gives us

$$-M^{-k} s s^T = M^{-(k-1)} s s^T M^{-1} + \dots + M^{-1} s s^T M^{-(k-1)} ,$$

which implies

$$-\text{Tr}(M^{-k} s s^T) = \text{Tr}(M^{-(k-1)} s s^T M^{-1}) + \dots + \text{Tr}(M^{-1} s s^T M^{-(k-1)}) .$$

It follows that

$$-\text{Tr}(s^T M^{-k} s) = \text{Tr}(s^T M^{-k} s) + \dots + \text{Tr}(s^T M^{-k} s) ,$$

and thus

$$s^T M^{-k} s = 0 .$$

The above equation shows that this class of functions does not have any stationary point.  $\square$

## B.2 PROOF FOR LEMMA 1

*Proof.* Let  $x = s^T K$ . Then  $f(L) = x^T (L + K)^{-1} K (L + K)^{-1} x$ . The gradient of the function is given by

$$\nabla f(L) = -(L + K)^{-1} x x^T (L + K)^{-1} K (L + K)^{-1} - (L + K)^{-1} K (L + K)^{-1} x x^T (L + K)^{-1} .$$

Let  $L_1, L_2 \in S_+^n$ . To show invexity for function  $f$ , we need to show that there exists an  $\eta(L_1, L_2)$  such that

$$f(L_1) - f(L_2) \geq \langle \eta(L_1, L_2), \nabla f(L_2) \rangle .$$

For our problem, this means that we need to show

$$\begin{aligned} & x^T (L_1 + K)^{-1} K (L_1 + K)^{-1} x - x^T (L_2 + K)^{-1} K (L_2 + K)^{-1} x \geq \\ & -\langle \eta(L_1, L_2), (L_2 + K)^{-1} x x^T (L_2 + K)^{-1} K (L_2 + K)^{-1} \rangle \\ & -\langle \eta(L_1, L_2), (L_2 + K)^{-1} K (L_2 + K)^{-1} x x^T (L_2 + K)^{-1} \rangle \\ & = -\text{Tr}(\eta(L_1, L_2)^T (L_2 + K)^{-1} x x^T (L_2 + K)^{-1} K (L_2 + K)^{-1}) \\ & -\text{Tr}(\eta(L_1, L_2)^T (L_2 + K)^{-1} K (L_2 + K)^{-1} x x^T (L_2 + K)^{-1}) \\ & = -\text{Tr}(x^T (L_2 + K)^{-1} K (L_2 + K)^{-1} \eta(L_1, L_2)^T (L_2 + K)^{-1} x) \\ & -\text{Tr}(x^T (L_2 + K)^{-1} \eta(L_1, L_2)^T (L_2 + K)^{-1} K (L_2 + K)^{-1} x) \end{aligned}$$

for a particular choice of  $\eta(L_1, L_2)$ . By choosing  $\eta(L_1, L_2) = \frac{L_2 + K}{2}$ , we get

$$\begin{aligned} & x^T(L_1 + K)^{-1}K(L_1 + K)^{-1}x - x^T(L_2 + K)^{-1}K(L_2 + K)^{-1}x \geq \\ & - \text{Tr}(x^T(L_2 + K)^{-1}K(L_2 + K)^{-1}x). \end{aligned}$$

As  $(L_1 + K)^{-1}$  is a symmetric positive definite matrix, the matrix obtained by left multiplying it with a positive diagonal matrix is the same as right multiplying it with the same diagonal matrix and is positive definite. Thus

$$x^T(L_1 + K)^{-1}K(L_1 + K)^{-1}x = x^T(L_1 + K)^{-1}K^{\frac{1}{2}}K^{\frac{1}{2}}(L_1 + K)^{-1}x \geq 0.$$

By following similar computation as shown in Theorem 1, it can be observed that the function has no stationary points and is  $\eta$ -inconv for  $\eta(\cdot, L) = \frac{(L+K)}{2}$ .  $\square$

### B.3 PROOF FOR LEMMA 3

*Proof.* From Theorem 1 we know that the class of functions  $f(I + L) = s^T(I + L)^{-k}s$  are  $\eta$ -inconv for  $\eta(\cdot, L) = I + L$ . Using the linearity of trace and partial derivative operators and following the similar computation as shown in Theorem (1), we can conclude that  $\sum_{i=1}^T s^T(I + L)^{-2i}s$  is  $\eta$ -inconv for  $\eta(\cdot, L) = I + L$ .  $\square$

### B.4 PROOF OF LEMMA 4

*Proof.* Recall that the Laplacian spectrum of the complete graph has an eigenvalue 0 with multiplicity 1 and an eigenvalue of  $n$  with multiplicity  $n - 1$ . When the opinions are mean-centered opinion vectors  $s$  (such that  $s^T \mathbf{1} = 0$ ), the expressed opinions are given by  $z = (I + L(K_n))^{-1}s = \frac{s}{n+1}$ . The polarization of expressed opinions in the first time period is  $z^T z = \|z\|^2 = \frac{\|s\|_2^2}{(n+1)^2}$ . The  $\mathcal{T}$ -period polarization for the complete graph is

$$\frac{\|s\|_2}{(n+1)^2} + \frac{\|s\|_2}{(n+1)^4} + \dots + \frac{\|s\|_2}{(n+1)^{2\mathcal{T}}}.$$

As each element in the above summation is the lower bound for the corresponding terms from the repeated polarization function, the global minimum for (4) is attained for  $K_n$ .  $\square$

### B.5 PROOF FOR LEMMA 5

*Proof.* Consider the following two optimization problems:

$$\begin{aligned} & \underset{L}{\operatorname{argmin}} \quad \max_{s \in \mathbb{R}^n, s \perp \mathbf{1}, \|s\|_2^2 \leq 1} \quad s^T(I + L)^{-2}s \\ & \text{subject to} \quad L \in \mathcal{L}, \\ & \quad L_{ij} = \{-1, 0\}, \text{ for } i \neq j \\ & \quad \|\operatorname{vec}(L) - \operatorname{vec}(L_0)\|_0 \leq 4k, \end{aligned} \tag{10}$$

and

$$\begin{aligned} & \max_L \quad \lambda_2(L) \\ & \text{subject to} \quad L \in \mathcal{L}, \\ & \quad L_{ij} = \{-1, 0\}, \text{ for } i \neq j \\ & \quad \|\operatorname{vec}(L) - \operatorname{vec}(L_0)\|_0 \leq 4k. \end{aligned} \tag{11}$$

Mosk-Aoyama (2008), showed that finding a set of edges within a specified budget to add to the graph so that the algebraic connectivity of the augmented graph is maximized is NP-hard. By Courant-Fischer theorem (Golub & Van Loan, 2013), we can observe that the inner maximization problem in (10) takes the maximum value of  $\frac{1}{(1+\lambda_2(L))^2}$ , when  $s$ , the mean-centered initial opinion vector, is the second smallest eigenvector of  $L$ . Thus for the outer minimization problem, we need an  $L$

obtained from  $L_0$  by adding  $k$  edges and with maximum  $\lambda_2$ . The graph associated with the Laplacian matrix returned by equation (10) is the same as the solution of equation (11). Thus, the computational hardness of minimizing polarization given in equation (10) is at least that of maximizing algebraic connectivity within the budget  $k$ .

□

## B.6 PROOF OF THEOREM 2

*Proof.* In the following we represent  $(I + L)^{-2}$  as  $\begin{bmatrix} W_{11} & W_{12} \\ W_{12} & W_{22} \end{bmatrix}$ , with each  $W_{ij}$  being a block matrix having appropriate dimensions. For the sake of clarity, we omit the dimension details when they are evident from the context. For a given set of initial opinions vector  $s = [s_1^T \ s_2^T]^T$ , the polarization function can be expressed as follows:

$$\begin{aligned} f(L) &= s^T (I + L)^{-2} s = [s_1^T \ s_2^T] \begin{bmatrix} W_{11} & W_{12} \\ W_{12} & W_{22} \end{bmatrix} \begin{bmatrix} s_1 \\ s_2 \end{bmatrix} \\ &= s_1^T W_{11} s_1 + s_1^T W_{12} s_2 + s_2^T W_{12} s_1 + s_2^T W_{22} s_2 \end{aligned}$$

On taking expectation with respect to the vector of unknowns  $s_2$  we get

$$\mathbb{E}(f(L)) = s_1^T W_{11} s_1 + \text{Tr}(W_{22})$$

Observe that the above equation can be rewritten as

$$\mathbb{E}(f(L)) = a^T (I + L)^{-2} a + \sum_{i=1}^m b_i^T (I + L)^{-2} b_i \quad (12)$$

where  $a = [s_1^T \ 0]^T$  and  $b_i = [0 \ e_i^T]$  for all  $i = \{1, \dots, m\}$ , with  $e_i \in \mathbb{R}^m$  denoting the standard unit vector containing a 1 at its  $i$ -th entry. Notice that  $a^T (I + L)^{-2} a$  and  $\sum_{i=1}^m b_i^T (I + L)^{-2} b_i$  are  $\eta$ -invex. Using the linearity of trace and partial derivative operators and following the similar computation as shown in Theorem (1), we can conclude that  $\mathbb{E}(f(L)) = a^T (I + L)^{-2} a + \sum_{i=1}^m b_i^T (I + L)^{-2} b_i$  is  $\eta$ -invex for  $\eta(\cdot, L) = I + L$ . □

## C EXAMPLE TO DEMONSTRATE THE NONCONVEXITY OF THE FUNCTION $s^T M^{-2} s$

Here, we provide a visual depiction illustrating the nonconvex nature of the function  $s^T M^{-2} s$ ,  $M \in S_{++}^n$ . In Figure 4, we plot the function  $f(z) = s^T \begin{bmatrix} z & 0.9 \\ 0.9 & 1 \end{bmatrix}^{-2} s$  with respect to  $z \in [1 \ 2]$  and  $s = \begin{bmatrix} 1 \\ 1 \end{bmatrix}$ . Notice that this function is nonconvex.

## D ADDITIONAL EMPIRICAL RESULTS FOR KNOWN INITIAL OPINIONS (PROBLEM 1)

In this section, we provide additional empirical results on various networks for minimizing polarization for known initial opinions (experiments are run using CVX solver (Diamond & Boyd, 2016; Agrawal et al., 2018; Grant & Boyd, 2014; 2008)).

**Multi-period polarization:** Note that the Laplacian that minimizes single-period polarization also minimizes multi-period polarization. In this section, we provide experimental details on single-period polarization (equation 5 and equation 6) and the performance of various approaches to minimize multi-period polarization equation 4 can directly be inferred from their performance in minimizing single-period polarization.



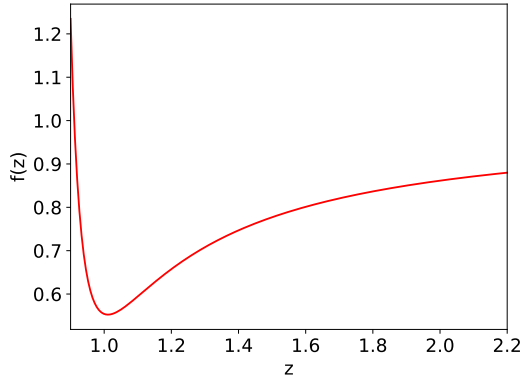

Figure 4: Nonconvexity of the function  $s^T M^{-2} s$

**Karate Club network:** This network represents a social conflict between an instructor and an administrator within a karate club, as documented by Zachary (1977). It is an undirected network comprising 34 nodes and 78 edges, where each node corresponds to a club member, and edges signify connections between members. Figure 1(a) illustrates the division of club members into two opinionated clusters due to the conflict. We attribute an initial opinion of "+1" or "-1" to each opinionated cluster.

In Figure 5, we present the polarization variations across different budget allocations for our invex relaxation model equation 6, the Coordinate Descent (CD) method, Tr minimization, and the Fiedler Difference (FD) approach. It is evident that the invex relaxation model consistently outperforms CD and other methods in terms of polarization reduction. FD reduces polarization by adding a single edge, resulting in the sparsest graph configuration. For our invex relaxation approach, by utilizing the thresholding parameter  $|\rho| = 0.0002$ , with 100 iterations of PGD, and employing a step size of  $\alpha = 0.5$ , the average number of edges across different budgets amounts to 184.

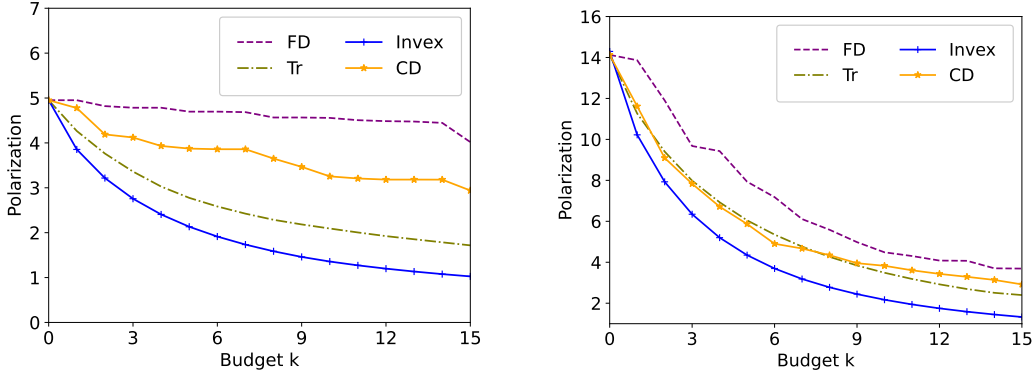

(a) Change in polarization with a budget on Karate Club network. Our nonconvex relaxation considerably reduces polarization compared to all other approaches.

(b) Change in Polarization on Sawmill Strike Network. Invex relaxation produces the best reduction in polarization compared to CD.

Figure 5: Polarization on Karate and Sawmill Networks

**Sawmill Strike network:** This network represents employees working at a sawmill during a period of strike. It is an undirected network comprising 24 nodes and 76 edges. The strike’s prolonged duration was believed to be due to ineffective communication between two distinct groups of employees within the network. The network was initially analyzed in Michael (1997) to identify leaders during the strike. In this study, we leverage this network to identify potential edges that could

minimize polarization. We attribute an initial opinion of "+1" to one group and "-1" to another group of nodes.

Figure 5 (b) depicts the variation in polarization as the budget increases. Notably, our invex relaxation approach consistently achieves the most substantial reduction in polarization across different budget allocations when compared to the Coordinate Descent (CD) method. For our invex relaxation method, employing  $|\rho| = 0.0002$  and with a step size of  $\alpha = 0.5$ , the average number of added edges amounts to 190.

**The US Senate:** This network captures the co-sponsorship of bills among US senators during session 114, as documented by Neal (2022). In this representation, each senator assumes the role of either a sponsor or co-sponsor of a bill, and edges between senators signify their joint co-sponsorship of a bill during that session. Recent studies, such as those by Hohmann et al. (2023) and Neal (2020), have explored the relevance of such co-sponsorship networks in the context of polarization. This particular network encompasses a total of 102 nodes, with 46 Democrats, 54 Republicans, and 2 Independents, interconnected by 1832 edges. We assign an initial opinion of "+1" to Democrats, "-1" to Republicans, and "0" to Independents.

Figure 6 visually presents the polarization reduction achieved using our proposed invex relaxation (equation 6), comparing it to the Coordinate Descent ((Rác & Rigobon, 2023)), the Tr minimization, and the Fiedler Difference (FD) approaches. In our computational experiments, we ran projected gradient descent for 100 iterations, employing a step size of  $\alpha = 0.2$  and setting  $|\rho| = 0.0002$ . The average number of edges added across all budgets amounts to 2436. The results, as depicted, demonstrate that our invex relaxation (equation 6) significantly outperforms all existing approaches in terms of minimizing polarization.

**Polbooks:** This network comprises books related to US politics and was compiled during the 2004 presidential election, as documented by Rossi & Ahmed (2015). Interactions within the network reflect instances where customers on the Amazon platform frequently purchased these books together. The books are categorized based on their political leanings, falling into three categories: Liberal, Conservative, or Neutral. Specifically, there are a total of 43 books classified as Liberal, 49 as Conservative, and 13 as Neutral. We assign an initial opinion of "+1" to Liberal, "-1" to Conservative, and "0" to Neutral. Figure 6(a) illustrates the variation in polarization across different budgets. The projected gradient descent for invex relaxation is executed for a maximum of 100 iterations, utilizing a step size of  $\alpha = 0.2$  and  $|\rho| = 0.0002$ .

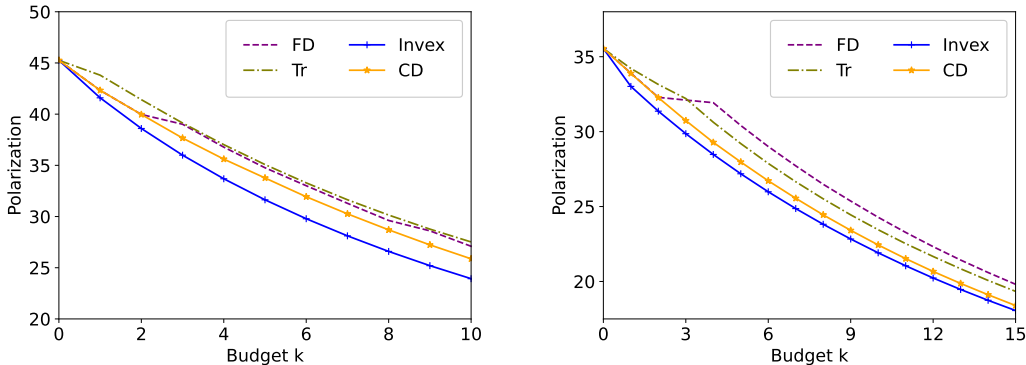

(a) Change in polarization with budget using invex relaxation, CD, Tr and FD on Polbooks

(b) Reduction in polarization with budget using invex relaxation, CD, Tr, and FD approaches on the US Senate Network.

Figure 6: Reduction in Polarization on Polbooks and US Senate networks

**Preferential Attachment (Scale Free) Network:** Preferential Attachment (PA) describes a mechanism of graph evolution where higher-degree nodes have a greater probability of receiving new neighbors. It is designed to model the power law behavior (Faloutsos et al., 1999). For our analysis, an incoming vertex connects to at most four other existing vertices in the graph. The resultant PA

network has 200 nodes and 768 edges. Nodes in the network are assigned an initial opinion of “+1” and “-1” uniformly at random.

Figure 7(a) visually illustrates the reduction in polarization across budgets ranging from  $k = 1$  to  $k = 15$ . Notably, our invex relaxation method (equation equation 6) consistently achieves the lowest polarization compared to other approaches. In our computational experiments, we executed projected gradient descent for up to 100 iterations, employing a step size of  $\alpha = 0.8$  and  $|\rho| = 0.0002$ . On average, after applying the thresholding parameter  $\rho$ , the invex relaxation approach added 1,410 edges across all budgets.

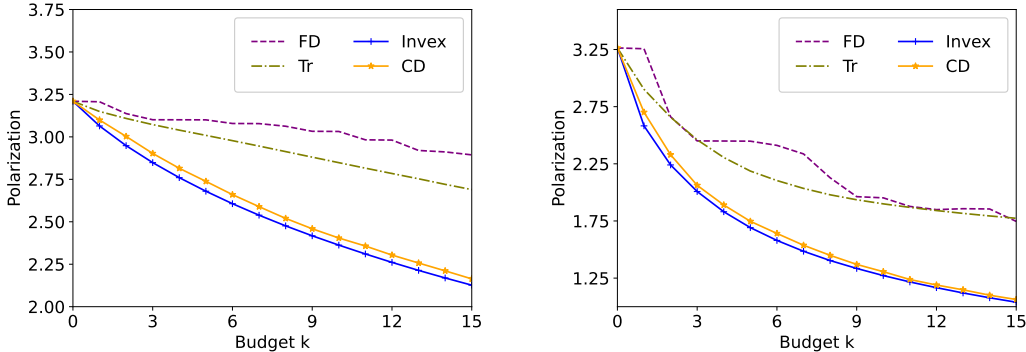

(a) Reduction in polarization with varying budgets using invex relaxation, CD, Tr, and FD approaches on Preferential Attachment network.

(b) Reduction in polarization with varying budgets using invex relaxation, CD, Tr, and FD approaches on Erdős-Rényi Graph.

Figure 7: Reduction in Polarization on Preferential Attachment and Erdős-Rényi graphs

**Erdős-Rényi:** In this model, each pair of vertices are connected independently with a probability  $p$  (Erdos & Renyi, 1960). We construct an Erdős-Rényi graph with 100 vertices and  $p = 0.1$ . Nodes in the network are assigned an initial opinion of “+1” and “-1” uniformly at random. The step size for invex relaxation equation 6 is set to  $\alpha = 0.8$ . The projected gradient descent on equation 6 is run for 100 iterations with thresholding parameter  $\rho = 0.0002$ . The change in polarization is depicted in Figure 7(b).

## E ADDITIONAL EXPERIMENTATION FOR PARTIALLY OBSERVABLE INITIAL OPINIONS:

Here, we present an additional baseline for comparison with the findings depicted in Figure 3(b). We employ the Coordinate Descent (CD) approach ((Rácz & Rigobon, 2023)), which necessitates complete knowledge of initial opinions. To facilitate our experimentation with CD, we estimate unknown opinions using mean imputation, specifically setting  $s_2 = \text{mean}(s_1)$ . The corresponding outcome is illustrated in Figure 8. It is evident that CD outperforms Trace when it has access to larger percentage of initial opinions.

## F INFLUENCE MODELS

In this section, we will review some of the most commonly used social influence models. We assume a real-valued, one-dimensional, continuous opinion space. In particular, we focus on linear continuous opinion models such as the DeGroot (1974) and Friedkin (1986). For simplicity, we choose the opinions to be scalar. Mathematically, they can also be a vector quantity representing an individual stance over various social phenomena.

### F.1 FRENCH-DEGROOT MODEL

French Jr (1956) proposed one of the first mathematical models for opinion formation and a group’s collective behavior. Along these lines, DeGroot (1974) generalized this method and named it “iterative

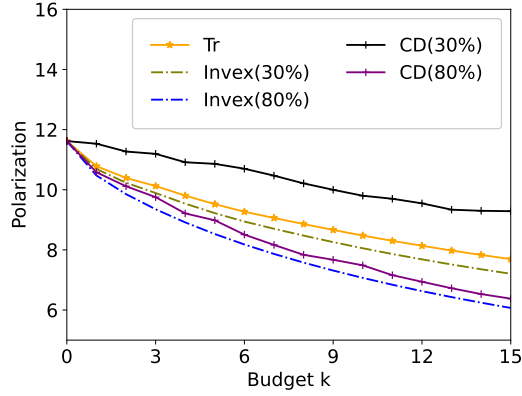

Figure 8: Change in polarization with budget for partially observable opinions of (30% and 80% of known initial opinions) using invex relaxation, CD (with mean imputation, i.e.,  $s_2 = \text{mean}(s_1)$ ) and  $\text{Tr}((I + L)^{-2})$

opinion pooling”. This model describes a social learning process of opinion formation based on observing other individuals in the network. It formalizes when and how quickly several actors can reach a consensus of beliefs. In this model, the individuals’ opinion is modeled as the harmonic average of the opinions of their neighbors in the network. Mathematically, the opinion update rule for estimates is given by the following equation:

$$z_i^{(t)} = \frac{1}{\text{deg}(i)} \sum_{j \in N(i)} w_{ij} z_j^{(t-1)}. \quad (13)$$

Here  $w_{ij}$  represents the weight of  $j$ ’s opinion on  $i$ , and the opinion of  $i$  at time  $t$  is written as  $z_i^{(t)}$ . The open neighborhood of vertex  $i$  in  $G$  is denoted by  $N(i)$ . The DeGroot model always converges to consensus when the graph is connected.

## F.2 FRIEDKIN-JOHNSEN MODEL (FJ)

Friedkin and Johnsen generalized the DeGroot model by taking into account prejudice or initial opinions of individuals in the network (Friedkin, 1986). Let  $s \in R^n$  represent the initial opinions of actors in the network. In the opinion dynamics process, this vector is assumed to be immutable. Let  $z \in R^n$  denote the expressed opinions. Let  $w_{ij} \geq 0$  denote the weight on edge  $(i, j) \in E$ . Fixed point iteration of the FJ opinion dynamics model is then given as

$$z_i^{(t)} = \frac{s_i + \sum_{j \in N(i)} w_{ij} z_j^{(t-1)}}{\sum_{j \in N(i)} w_{ij} + 1}. \quad (14)$$

At each time step, every actor adopts an expressed opinion that is proportional to the average of its own initial opinion and the opinion of its neighbors. It is well known that the above-defined FJ dynamics converge to an equilibrium set of opinions  $z^*$  (Bindel et al., 2015) given by

$$z^* = (I + L)^{-1} s. \quad (15)$$

In the above expression,  $I$  is an Identity matrix, and  $L$  is the combinatorial Laplacian of  $G$  given by  $D - W$ . Note that  $(I + L)$  is a positive definite matrix, and hence the inverse exists. From the equation (15), we can also observe that the expressed opinions are a contraction of initial opinions, i.e.,  $z_i$  is a convex combination of initial opinions of all nodes, including node  $i$  in the network. Consensus is not guaranteed in FJ dynamics. Bindel et al. (2015) used this to quantify the price for not reaching the consensus. They show that updating  $z_i$  as given in equation (14) is the same as minimizing the following quadratic function:

$$\min_{z_i} (z_i - s_i)^2 + \sum_{j \in N(i)} w_{ij} (z_i - z_j)^2 .$$

The term  $(z_i - s_i)^2$  is the stress incurred at node  $i$  due to the difference between its initial and expressed opinions (also known as internal conflict) and the second term,  $\sum_{j \in N(i)} w_{ij} (z_i - z_j)^2$ , as the external conflict incurred due to the difference between the expressed opinions of the node  $i$  and its neighbors.

### F.3 IN-HOMOGENOUS STUBBORNNESS IN FJ MODEL

The stubbornness of actors/nodes in the network is defined as the degree of resilience to change from their initial opinions. Recently Xu et al. (2022) studied the Friedkin-Johnsen model in the presence of in-homogeneous stubbornness. The fixed point iteration of a node  $i$  on a graph  $G$  where every node has a certain degree of stubbornness to their initial opinions is then given as

$$z_i^{(t)} = \frac{k_i s_i + \sum_{j \in N(i)} w_{ij} z_j^{(t-1)}}{\sum_{j \in N(i)} w_{ij} + k_i} . \quad (16)$$

In the above equation,  $k_i$  denotes the the degree of stubbornness and  $k_i \geq 0$ . By iterating the above equation, the expressed opinion vector at equilibrium  $z^*$  is given as

$$z^* = (L + K)^{-1} K s , \quad (17)$$

where  $K$  is a diagonal matrix with the degree of the stubbornness of each node in the network as its diagonal entries. From (17), we see that if the initial opinions of all nodes are perturbed by a constant  $c$ , the expressed opinions are changed to  $z^* + c$ .

## G INVEXITY OF POLARIZATION WITH PARTIALLY KNOWN OPINIONS

In this section, we revisit the results presented in Section 5, specifically focusing on Theorem 2, but with less restrictive assumptions concerning the distribution of the unknown initial opinions  $s_2$ . While we maintain the assumption of zero mean for these opinions, we now allow for a more general covariance matrix. Our objective is to establish the following result:

**Theorem 3.** *Given a vector  $s \in \mathbb{R}^n$  defined as  $s = [s_1^T \quad s_2^T]^T$ , where  $s_1 \in \mathbb{R}^{n-m}$  and  $s_2 \in \mathbb{R}^m$ , and assuming that  $s_2$  is selected from a distribution satisfying  $\mathbb{E}(s_2) = 0$  and  $\mathbb{E}(s_2 s_2^T) = \Sigma$ , it follows that  $\mathbb{E}(f(L))$  is invex.*

*Proof.* Borrowing the notations from the Proof of Theorem 2, we represent  $(I + L)^{-2}$  as  $\begin{bmatrix} W_{11} & W_{12} \\ W_{12} & W_{22} \end{bmatrix}$ , where each  $W_{ij}$  is a block matrix with appropriate dimensions. For clarity, we omit dimension details when evident. For a given initial opinions vector  $s = [s_1^T \quad s_2^T]^T$ , the polarization function is expressed as:

$$\begin{aligned} f(L) &= s^T (I + L)^{-2} s = [s_1^T \quad s_2^T] \begin{bmatrix} W_{11} & W_{12} \\ W_{12} & W_{22} \end{bmatrix} \begin{bmatrix} s_1 \\ s_2 \end{bmatrix} \\ &= s_1^T W_{11} s_1 + s_1^T W_{12} s_2 + s_2^T W_{12} s_1 + s_2^T W_{22} s_2 \end{aligned}$$

Taking the expectation with respect to the vector of unknowns  $s_2$ , we obtain:

$$\mathbb{E}(f(L)) = s_1^T W_{11} s_1 + \mathbb{E}(s_2^T W_{22} s_2) \quad (18)$$

$$= s_1^T W_{11} s_1 + \mathbb{E}(\text{Tr}(W_{22} s_2 s_2^T)) \quad (19)$$

$$= s_1^T W_{11} s_1 + \text{Tr}(W_{22} \mathbb{E}(s_2 s_2^T)) \quad (20)$$

$$= s_1^T W_{11} s_1 + \text{Tr}(W_{22} \Sigma), \quad (21)$$

where equation 20 follows due to the linearity of the trace function.

Since covariance matrix  $\Sigma$  is a positive semidefinite matrix, it has a unique square root, i.e.,  $\Sigma = BB^T$  for a symmetric square matrix  $B$ . Using this property along with the cyclicity property of trace, we rewrite equation 21 as below:

$$\mathbb{E}(f(L)) = s_1^T W_{11} s_1 + \text{Tr}(BW_{22}B) \quad (22)$$

If we represent  $B = [b_1 \ b_2 \ \cdots \ b_m]$  for vectors  $b_i \in \mathbb{R}^m, \forall i = \{1, \dots, m\}$ , then equation 22 can be expressed as:

$$\mathbb{E}(f(L)) = s_1^T W_{11} s_1 + \sum_{i=1}^m b_i^T W_{22} b_i, \quad (23)$$

which can be further rewritten as

$$\mathbb{E}(f(L)) = a^T (I + L)^{-2} a + \sum_{i=1}^m \bar{b}_i^T (I + L)^{-2} \bar{b}_i, \quad (24)$$

where  $a = [s_1^T \ 0]^T$  and  $\bar{b}_i = [0 \ b_i^T]^T$  for all  $i = \{1, \dots, m\}$ . Recall that  $a^T (I + L)^{-2} a$  and  $\sum_{i=1}^m \bar{b}_i^T (I + L)^{-2} \bar{b}_i$  are  $\eta$ -invex. Using the linearity of trace and partial derivative operators and following the similar computation as shown in Theorem (1), we can conclude that  $\mathbb{E}(f(L)) = a^T (I + L)^{-2} a + \sum_{i=1}^m \bar{b}_i^T (I + L)^{-2} \bar{b}_i$  is  $\eta$ -invex for  $\eta(\cdot, L) = I + L$ .  $\square$
